# Supplementary material
Source: Springer Nature journal article supplement (https://www.springermedizin.de/resource/supplementary/12990_2013_607_MOESM2_ESM.pdf/9613620)

# Suppl Fig. 2

## A

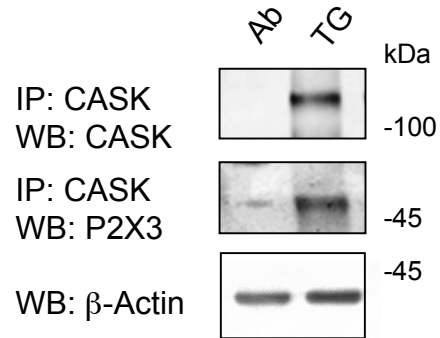

## B

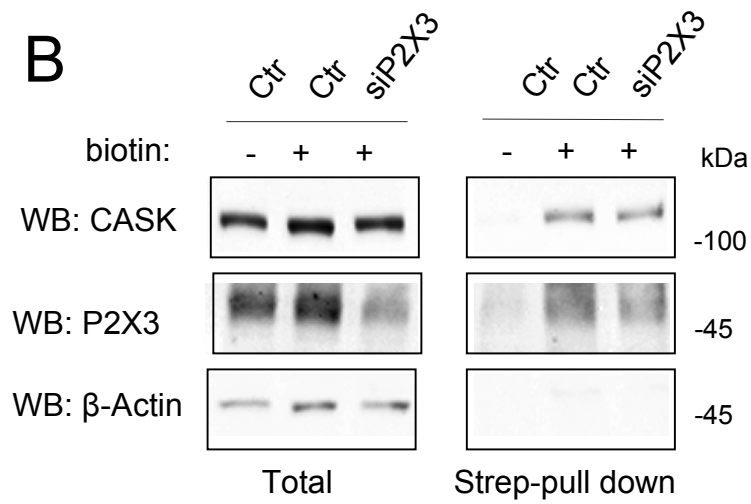

Supplement: MOESM2 [file 9613620]
